# Supplementary material for: TonEBP Promotes β-Cell Survival under ER Stress by Enhancing Autophagy
Source: PubMed Central journal article supplement (PMC7563687; doi:10.3390/cells9091928), 2020-08-20
Supplement: cells-09-01928-s001.pdf [file cells-09-01928-s001.pdf]

## Supplementary Information

### TonEBP increases $\beta$ -cell survival under ER stress by enhancing autophagy

Kang et al.

## Supplementary Methods

### RNA isolation and real-time PCR

Total RNA from MIN6-M9 cells was isolated using the TRIzol reagent (Invitrogen) according to the manufacturer's instructions. cDNA was synthesized by M-MLV reverse transcriptase (Promega, Madison, WI, USA). After reverse transcription, real-time PCR was performed using SYBR Green I Master and LightCycler 480 II (Roche). Measured cycle threshold values were normalized for the cyclophilin A reference gene, and they were expressed as fold change over control samples. The primers are described in Supplementary Table 1.

### Supplementary figure legends

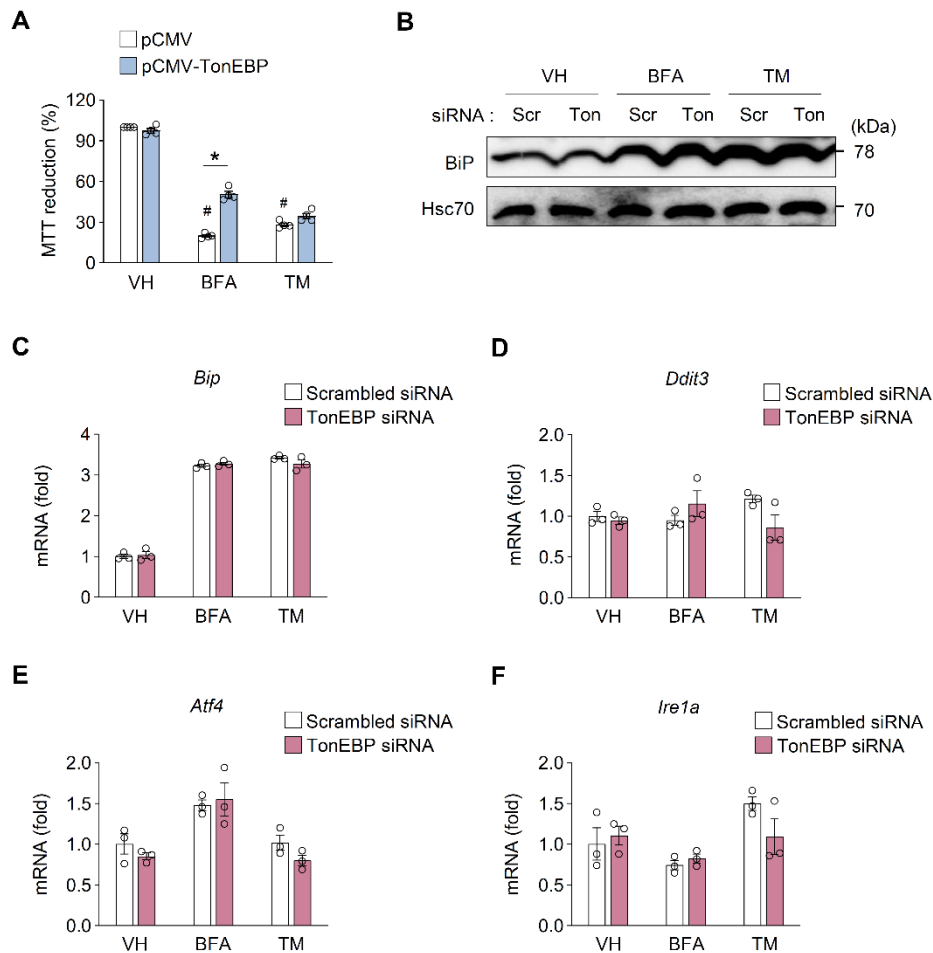

**Figure S1. TonEBP promotes autophagy without changes in ER stress-related protein and mRNA expression.** (A) MIN6-M9 cells were transfected with plasmids expressing TonEBP or vector alone (pCMV) and then treated with brefeldin A (BFA; 20  $\mu$ M) or tunicamycin (TM; 1  $\mu$ g/ml). Cell viability calculated in %. Mean + SD. #  $p < 0.05$  vs pCMV-VH. \* $p < 0.05$ . (B-F) MIN6-M9 cells were transfected with scrambled siRNA (scr) or TonEBP-targeted siRNA (Ton) and then treated with brefeldin A (BFA; 10 $\mu$ M) or tunicamycin (TM; 1 $\mu$ g/ml) for 4 h. (B) The cells were immunoblotted for BiP and Hsc70. (C)

- F) mRNA expression for *Bip* (C), *Ddit3* (D), *Atf4* (E) and *Ire1a* (F) was examined by RT Q-PCR. Mean + SD,  $n = 3$ . \* $p < 0.05$  (unpaired t-test).

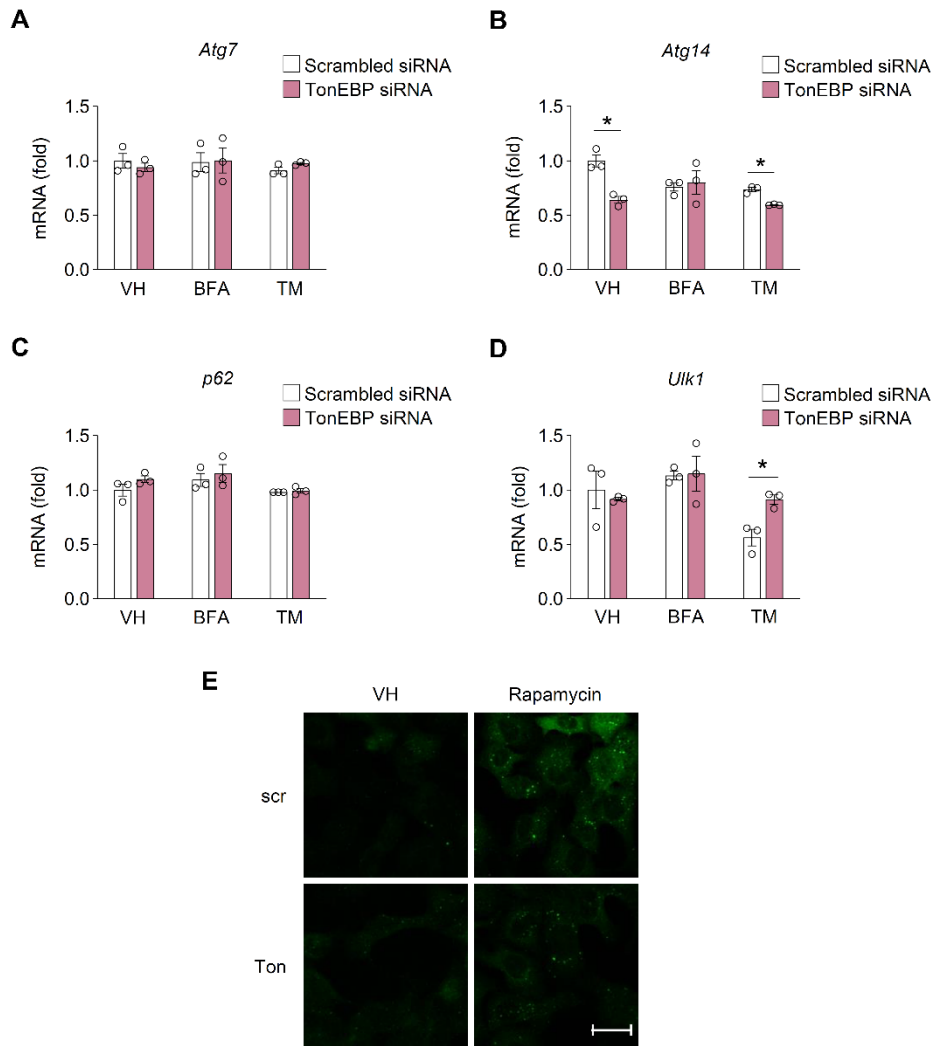

**Figure S2. TonEBP promotes autophagy without changes in ATG7, ATG14, p62 and ULK1 mRNA.** (A–D) MIN6-M9 cells were transfected with scrambled-siRNA or TonEBP-targeted siRNA. Cells were treated with brefeldin A (BFA; 20  $\mu$ M) or tunicamycin (TM; 1  $\mu$ g/ml) for 4 h and mRNA expression for *Atg7* (A), *Atg14* (B), *p62* (C) and *Ulk1* (D) was examined by RT Q-PCR. Mean + SD,  $n = 4$ . \* $p < 0.05$  (unpaired t-test). (E) Cells transfected with scrambled siRNA (scr) or TonEBP-targeted siRNA (Ton) were treated for 6 h with vehicle (VH) or rapamycin (1  $\mu$ M). Cells were then immunostained for LC3.

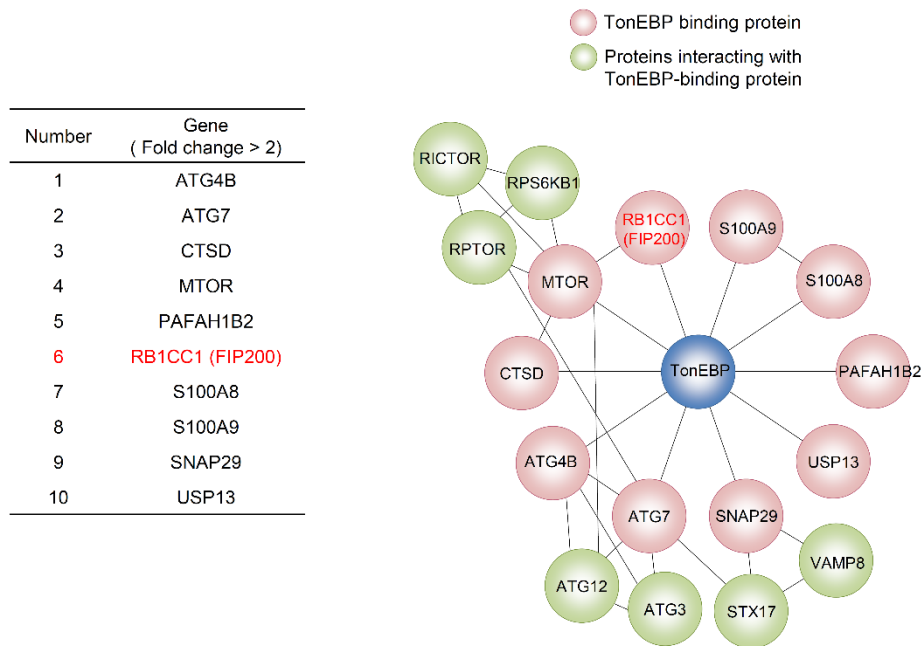

**Figure S3.** TonEBP-interacting proteins related to autophagy initiation. Yc1 of TonEBP was used to detect TonEBP-binding proteins (1). Among >460 interacting proteins, those proteins known to be involved in autophagy initiation are shown in red. Proteins predicted to interact with TonEBP-binding proteins (green) were identified using STRING (<https://string-db.org/>).

**Table S1.** Primers used for real time PCR.

| Species | Gene          | Forward primer (5'-3')   | Reverse primer (5'-3')   |
|---------|---------------|--------------------------|--------------------------|
| Mouse   | <i>TonEBP</i> | AAGCAGCCACCACCAAACATGA   | AAATTGCATGGGCTGCTGCT     |
|         | <i>BiP</i>    | TGCAGCAGGACATCAAGTTC     | TACGCCTCAGCAGTCTCCTT     |
|         | <i>Ddit3</i>  | AAGATGAGCGGGTGGCAGCG     | GCACGTGGACCAGGTTCTGCT    |
|         | <i>Atf4</i>   | GAGCTTCCTGAACAGCGAAGTG   | TGGCCACCTCCAGATAGTCATC   |
|         | <i>Ire1a</i>  | TGTGGTCAAGATGGACTGG      | GAAGCGGGAAGTGAAGTAGC     |
|         | <i>Atg7</i>   | ATGCCAGGACACCCTGTGAAGTTC | ACATCATTGCAGAAGTAGCAGCCA |
|         | <i>Atg14</i>  | TGTACCTGGTCAGTCCAAGCTC   | CAGGTCGGTTTCTTCATCGCTG   |
|         | <i>p62</i>    | TGTGGAACATGGAGGGAAGAG    | TGTGCCTGTGCTGGAACITTC    |
|         | <i>Ulk1</i>   | GCAGCAAAGACTCCTGTGACAC   | CCACTACACAGCAGGCTATCAG   |

## References

1. Kang, H.J.; Park, H.; Yoo, E.J.; Lee, J.H.; Choi, S.Y.; Lee-Kwon, W.; Lee, K.Y.; Hur, J.H.; Seo, J.K.; Ra, J.S., et al. TonEBP Regulates PCNA Polyubiquitination in Response to DNA Damage through Interaction with SHPRH and USP1. *iScience* **2019**, *19*, 177-190, doi:10.1016/j.isci.2019.07.021.
